# Supplementary material for: Cancer cells impair monocyte-mediated T cell stimulation to evade immunity
Source: PubMed Central journal article supplement (PMC7617236; doi:10.1038/s41586-024-08257-4), 2024-11-27
Supplement: EMS201733-supplement-Supplementary_Figure_1.pdf [file EMS201733-supplement-Supplementary_Figure_1.pdf]

## Cancer cells impair monocyte-mediated T cell stimulation to evade immunity

Anais Elewaut<sup>1,2#</sup>, Guillem Estivill<sup>1,2#</sup>, Felix Bayerl<sup>3</sup>, Leticia Castillon<sup>4</sup>, Maria Novatchkova<sup>1</sup>, Elisabeth Pottendorfer<sup>1,2</sup>, Lisa Hoffmann-Haas<sup>1</sup>, Martin Schönlein<sup>1</sup>, Trung Viet Nguyen<sup>1</sup>, Martin Lauss<sup>5</sup>, Francesco Andreatta<sup>1</sup>, Milica Vulin<sup>1</sup>, Izabela Krecioch<sup>1</sup>, Jonas Bayerl<sup>1,2</sup>, Anna-Marie Pedde<sup>3</sup>, Naomi Fabre<sup>1</sup>, Felix Holstein<sup>1,2</sup>, Shona M. Cronin<sup>1,2</sup>, Sarah Rieser<sup>1</sup>, Denarda Dangaj Laniti<sup>6,7,8</sup>, David Barras<sup>6,7,8</sup>, George Coukos<sup>6,7,8</sup>, Camelia Quek<sup>9,10,11</sup>, Xinyu Bai<sup>9,10,11</sup>, Miquel Muñoz i Ordoño<sup>1</sup>, Thomas Wiesner<sup>12</sup>, Johannes Zuber<sup>1</sup>, Göran Jönsson<sup>5</sup>, Jan P. Böttcher<sup>3</sup>, Sakari Vanharanta<sup>4,13</sup>, Anna C. Obenauf<sup>1\*</sup>

<sup>1</sup> Research Institute of Molecular Pathology (IMP), Vienna BioCenter (VBC), Vienna, Austria

<sup>2</sup> Vienna BioCenter PhD Program, Doctoral School of the University of Vienna and Medical University of Vienna, Vienna, Austria

<sup>3</sup> Institute of Molecular Immunology, School of Medicine and Health, Technical University of Munich (TUM), Munich, Germany

<sup>4</sup> Translational Cancer Medicine Program, Faculty of Medicine, University of Helsinki, Helsinki, Finland

<sup>5</sup> Lund University Cancer Center, Division of Oncology, Lund University, Lund, Sweden

<sup>6</sup> Ludwig Institute for Cancer Research, Lausanne Branch, University of Lausanne (UNIL), Lausanne, Switzerland

<sup>7</sup> Department of Oncology, University Hospital of Lausanne (CHUV) and University of Lausanne (UNIL), Lausanne, Switzerland

<sup>8</sup> Agora Research Center, Lausanne, Switzerland

<sup>9</sup> Melanoma Institute Australia, The University of Sydney, Sydney, Australia

<sup>10</sup> Charles Perkins Centre, The University of Sydney, Sydney, Australia

<sup>11</sup> Faculty of Medicine and Health, The University of Sydney, Sydney, Australia

<sup>12</sup> Department of Dermatology, Medical University of Vienna, Vienna, Austria

<sup>13</sup> Department of Biochemistry and Developmental Biology, Faculty of Medicine, University of Helsinki, Finland

# authors contributed equally

\* Correspondence: [anna.obenauf@imp.ac.at](mailto:anna.obenauf@imp.ac.at)

### Lead Contact:

Anna C. Obenauf  
Research Institute of Molecular Pathology (IMP)  
Campus-Vienna-Biocenter 1  
1030 Vienna, Austria

Tel.: +43 1 79730-3060

Email: [anna.obenauf@imp.ac.at](mailto:anna.obenauf@imp.ac.at)

**Contents:**

**Legends for Supplementary Tables 1 to 8**.....1

**Supplementary Figure 1: Uncropped Western Blot Gel Images**.....2

## Supplementary Table Legends:

**Supplementary Table 1: Top 20 markers from scRNA-seq populations.** Gene lists depicting the top differentially expressed genes of each identified population in the scRNA-seq from the immune TME of YUMM1.7<sup>OVA</sup> tumors.

**Supplementary Table 2: scRNA-seq gene signatures.** Publicly available T cell signatures used to probe the scRNA-seq data of OT-1 T cells isolated from YUMM1.7<sup>OVA</sup> tumors, publicly available inflammatory gene signatures and the Monocyte 1 and Inflammatory Monocyte gene signatures generated with the scRNA-seq dataset from our study.

**Supplementary Table 3: Differentially expressed genes in N<sup>TT</sup> and R<sup>TT</sup> cancer cells.** Differentially expressed genes ( $\log_2FC > 2$ ,  $p\text{-value} < 0.05$ ) from YUMM1.7<sup>OVA</sup> N<sup>TT</sup> and R<sup>TT</sup> cancer cells sorted from tumors and analyzed by RNA-sequencing.

**Supplementary Table 4: Differentially expressed genes in the TME and TME signatures.** Gene lists depicting the differentially expressed genes in the immune TME of *Ptgs1/2* KO and IRF3/7 R<sup>TT</sup> compared to CTRL R<sup>TT</sup> YUMM1.7<sup>OVA</sup> tumors ( $\log_2FC > 1$ ,  $p\text{-value} < 0.05$ ) analyzed by scRNA-seq. Gene signatures derived (TME-COX and TME-IRF3/7) and their human orthologs are included.

**Supplementary Table 5: Meta-analysis studies.** Main characteristics of studies included in the meta-analysis, including cancer type, numbers of patients, COX inhibitors used and immunotherapy specification.

**Supplementary Table 6: Search query for meta-analysis.** Contains the exact search query that was used for the meta-analysis in this study.

**Supplementary Table 7: RT-qCPR primer and sgRNA list.** Contains a list with all primer pairs used for RT-qPCR experiments and sgRNAs used for CRISPR/Cas9 knockouts.

**Supplementary Table 8: Antibody list.** Contains a list with all antibodies used in this study for flow cytometry, immunofluorescence, western-blotting and *in vivo* and *in vitro* depletion experiments.

# UNCROPPED WESTERN BLOT IMAGES

## 1. A375 Melanoma BLOT: **Extended Data Fig. 5s**

- HISTONE3 (18kDa)

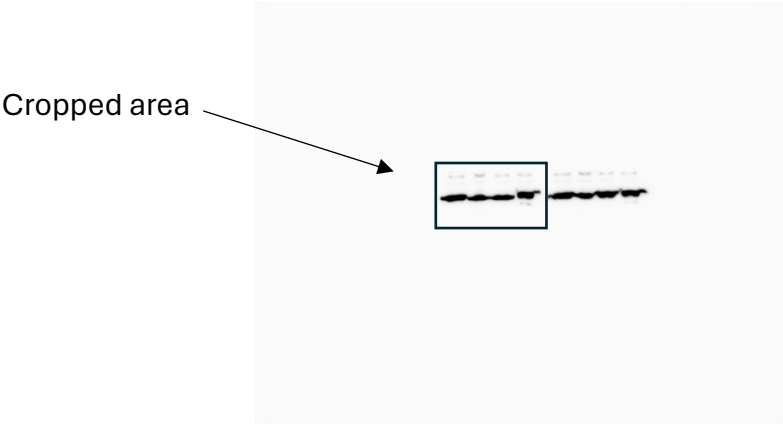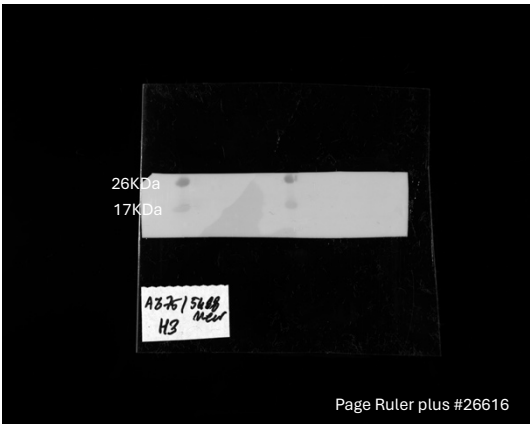

- COX2 (74 kDa)

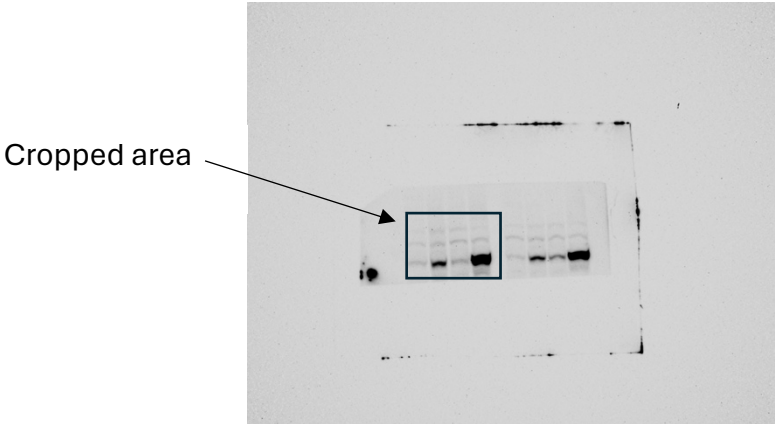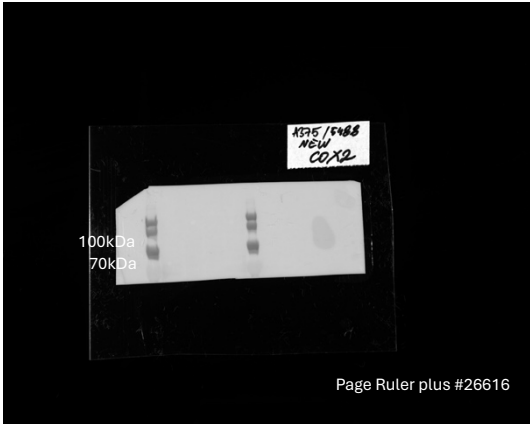

Histone control run on the same gel. Gel was cut for antibody incubation and development.

## 2. YUMM1.7 Melanoma BLOT: Extended Data Fig. 5m

- Vinculin (~116kDa)  
\*on left side for COX2 samples on right side for COX1 samples

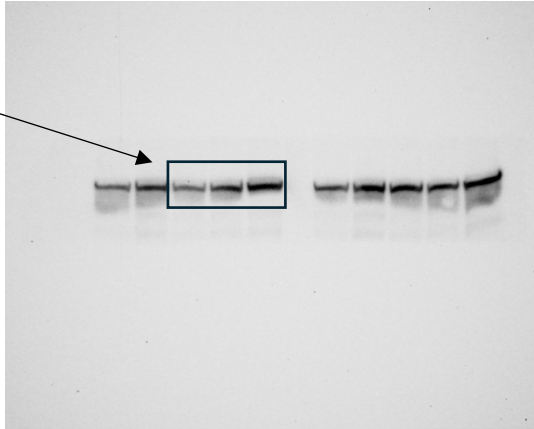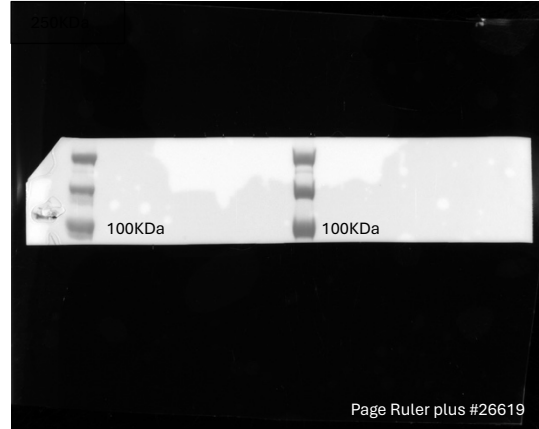

- COX 1 (left) COX2 (right) ~74kDa

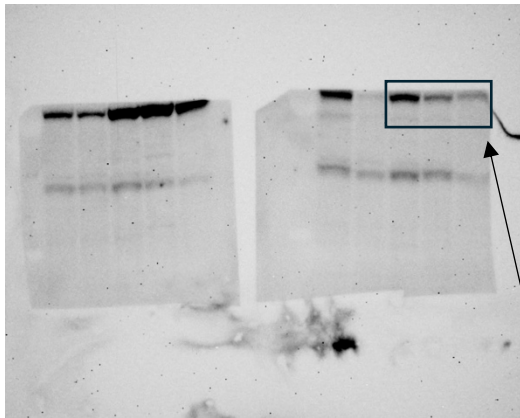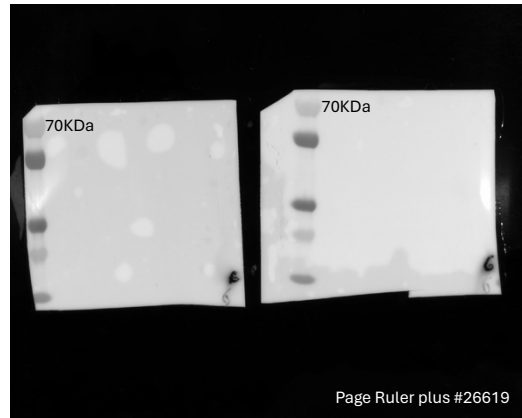

Vinculin control run on the same gel. Gel was cut for antibody incubation and development.
