# Supplementary material for: Cancer cells impair monocyte-mediated T cell stimulation to evade immunity
Source: Springer Nature journal article supplement (doi:10.1038/s41586-024-08257-4), 2024-11-27
Supplement: MOESM1 [file 41586_2024_8257_MOESM1_ESM.pdf]

---

**Supplementary information**

---

**Cancer cells impair monocyte-mediated T cell stimulation to evade immunity**

---

In the format provided by the  
authors and unedited

## UNCROPPED WESTERN BLOT IMAGES

### 1. A375 Melanoma BLOT: **Extended Data Fig. 5s**

- HISTONE3 (18kDa)

Cropped area

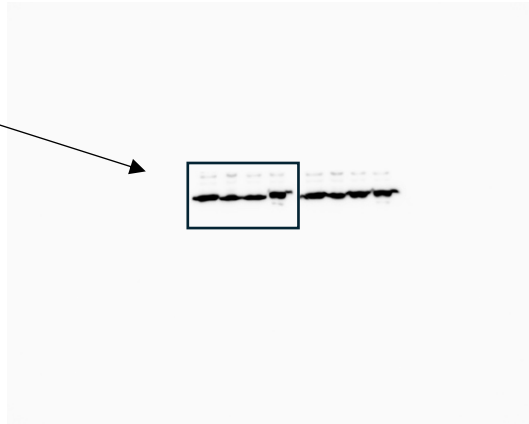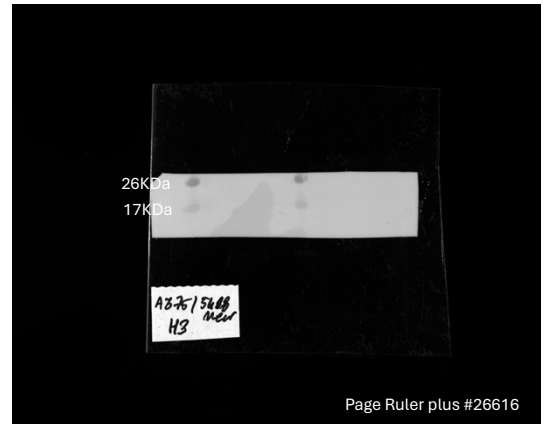

- COX2 (74 kDa)

Cropped area

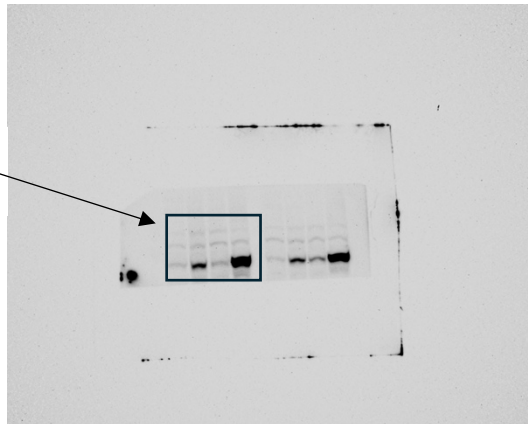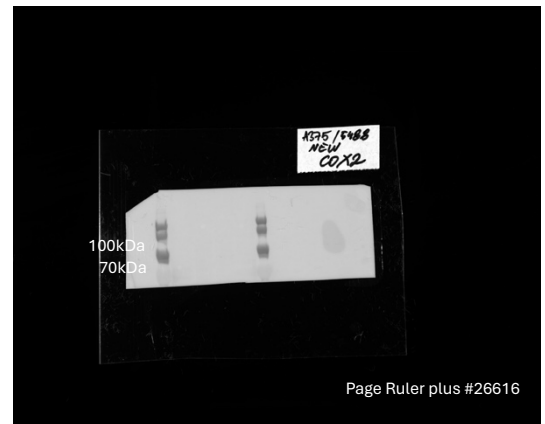

Histone control run on the same gel. Gel was cut for antibody incubation and development.

## 2. YUMM1.7 Melanoma BLOT: **Extended Data Fig. 5m**

- Vinculin (~116kDa)  
\*on left side for COX2 samples on right side for COX1 samples

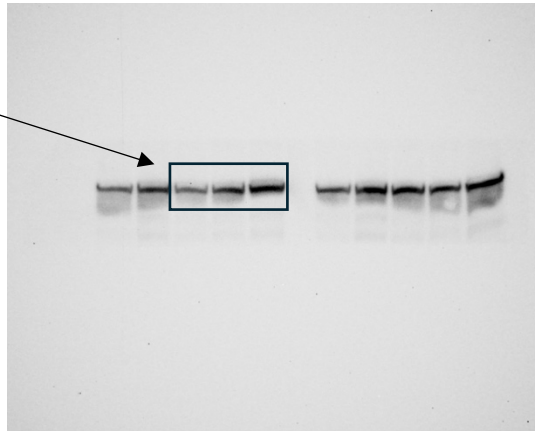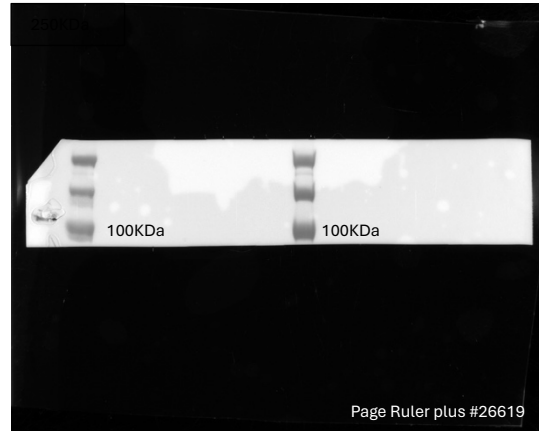

- COX 1 (left) COX2 (right) ~74KDa

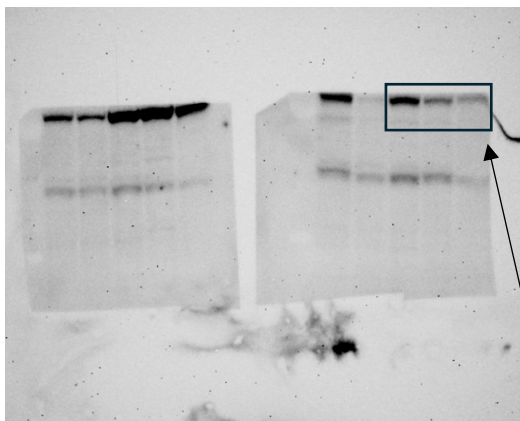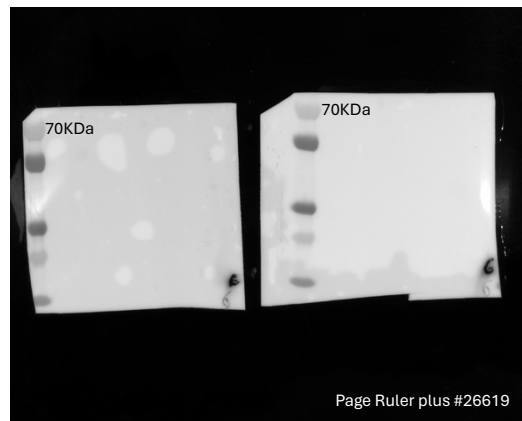

Vinculin control run on the same gel. Gel was cut for antibody incubation and development.
